# Supplementary material for: Immune response dynamics in COVID-19 patients to SARS-CoV-2 and other human coronaviruses
Source: PLoS One. 2021 Jul 9;16(7):e0254367. doi: 10.1371/journal.pone.0254367 (PMC8270414; doi:10.1371/journal.pone.0254367)
Supplement: S4 Appendix — (XLSX) [file pone.0254367.s012.xlsx]

## Sheet: S4 Appendix
Disease controls- Multiplex Antibody Detection (IgG); Median Fluorescence Intensities for each sample
Sample #	SARS-CoV-2 S-RBD	SARS-CoV S	SARS-CoV N	MERS-CoV S-RBD	HCoV 229E S	HCoV NL63 S	HCoV HKU1 S	HCoV OC43 S	Anti-human IgG	BSA
COPD patients,N=66
COPD 1/12	23.5	65	28.5	111	491	223	1225	1860	8575	12
COPD 2/12	37.5	312.25	1014	239.25	2575	722.25	4550	3265.25	9700.25	22
COPD 3/12	29	84	61	126	8659	2607.5	4832	9249	8325	14
COPD 4/12	57	90.5	37	47	4930	979	1570.5	2048	7174	13
COPD 5/12	64	88	128.5	160	891	253	1973	1363	8023.5	36
COPD 9/12	56	173	716	253	1773	377	2196	5009.5	8314.5	45
COPD 12/12	33	63	77	137	5310	1901	7920	3495.5	7039	22
COPD 14/12	66	97	79	110.5	2743.5	1109	2828	5880	6795	58
COPD 15/12	47	80	56	89	2031.5	833	2217	4417	5946	47
COPD 16/12	29.5	46	217.5	88	1164.5	168.5	6202	4190	8402	17
COPD 17/12	32	93	63	234	4075.5	488.5	2681	2161	7923.5	23
COPD 18/13	35	60	38	63	3725.5	3061.5	3118.5	5241	8137	13
COPD 19/13	38	7318.5	644	1445	1342	459.5	1660	4368	7495	28
COPD 20/13	28	124	33	155	3038	1039.5	2652	3664.5	6446.5	12
COPD 21/13	53.5	66.5	46	298	2677	1417	7220	4391.5	6957	17
COPD 22/13	29	302	48	2517	3531	1283	4054	1803	6814.5	18
COPD 23/13	53	141	93	456	1700	768	2952	2478	7889	82
COPD 24/13	51	200	35	160	6674	1235	4512.5	5269	7761.5	18
COPD 25/13	25	41	188	41	1615	198.5	1859	1551	8653	12
COPD 26/13	72	321.5	72	595	1560	385	6007	2441	8080	26
COPD 27/13	25.5	240	42.5	304.5	2191	401.5	7284	5329	8243	12
COPD 28/13	41.5	497	435	241	2862	1016	8219	1699.5	6973	20.5
COPD 29/13	48	658	394	483	1485	447	969	1974	7978	73
COPD 30/13	32	71	37	155.5	1805	288	5246	2415	7722	18
COPD 31/13	23	67	37	103.5	3393.5	1070	6181	8022	6251.5	13
COPD 32/13	113.5	126.5	373.5	389	1025	794	3101	2381	8145.5	15
COPD 33/13	33	169	46	494	2511	737	5107	5744	8446	17
COPD 34/13	28	103.5	2150	42	2705	1016.5	4329	5409.5	7682.5	12
COPD 35/13	26	329	32	522.5	2753	259	3434	1638	7690	14
COPD 36/13	25	319.5	32.5	551.5	2597	269	3139	1637	8058	14
COPD 37/13	48	81	94	359	1739	1426.5	1984	1313	8474	19
COPD 38/13	28	41	30	191	4016	1340.5	4633	2774.5	8052	13
COPD 39/13	32	153	701	410	2589	766.5	7892	2137	7926	14
COPD 40/13	23	66	42.5	65.5	2921	853	4356	5327	8316.5	14
COPD 41/13	40	98	39	160	1233.5	941	5430	5516.5	9074	12
COPD 42/13	31	59	40	184.5	1775	674	2437	1714	8139.5	34
COPD 43/13	34	242	72	79.5	6475	2526.5	2038	2972	7466	31.5
COPD 44/13	44	72.5	67	84	2689	598	3078.5	2532	8339	45
COPD 45/13	26	207	33	793	451	153	3264	2744	7957	16
COPD 46/13	244	61	49.5	145	9217.5	3397	10429	3884	7830.5	16
COPD 47/13	30	51	31	66.5	2554	618	4482	3131	7653.5	12
COPD 48/13	42.5	136.5	243	159	6943	289.5	2402	5068	8269.5	39
COPD 49/13	30	71	282	121	2702	670	4973	4253.5	8747	14
COPD-50/13	27	125	37	353	7218	859	4415	3076.5	8227	14
COPD-51/13	30.5	565	37	323.5	6827	417	4855	1884	8510.5	16
COPD-53/13	26	54	87.5	55	1061	645	5170	2131	8543	19
COPD-54/13	34	176.5	385	272	2035	186.5	657	1328	7440	19
COPD-55/13	28.5	214	43	94	993	588	3330.5	2531	7998	13
COPD-56/13	31	185	407	275	2312	215	744.5	1413	7028	16
COPD-62/13	45	915	63	454	5919	1077	3085	2811	8131	18
COPD-63/13	34	825	227	375	3791.5	1286	7655	5073.5	7974	20
COPD-64/13	28	68	70	60	994	381	4618	3658	8273.5	14
COPD-65/13	26	43	30.5	35	1427	255	853	1239	8804	11
COPD-66/13	57	733	52.5	302	7642.5	2726	11488	7993	8403	16
COPD-67/13	171	284	599	396	7242	2679	6340	5239.5	6882.5	227
COPD-68/13	24	61	38	104.5	837	124	807	2296.5	7303	16
COPD-69/13	383	629	36	45	4951	658	1701	2358	7827	12
COPD-70/13	30	169	38	119	9691.5	326	6615	2037	7826	22
COPD-72/13	49.5	1522	98	765	8660	2687.5	5015	7433.5	7881	58
COPD-73/13	70	60	502.5	102	1733	2006	3542.5	3020	8484	26
COPD-74/13	50.5	231	46.5	47	2638	657.5	7726.5	2317	7662	14
COPD-75/13	29	72	43	57.5	5031	1560	9145	5759	7904	16
COPD-76/13	28	77.5	272	447	1837	640	3383	3653.5	5556	15.5
COPD-78/13	41	66	38	97.5	442	306.5	2730	1131	8472	21
COPD-79/13	33	1117	43	274	5473	1788	6126	4656	8217.5	15
COPD-80/13	38	146	61	135	4137	384.5	840	1947	8124	15
TB Patients, N=32
TB 97/11	133.25	251	324.75	329.5	1165.5	679	919.25	5963.25	9420.75	181.75
TB PTS 05/14	31.5	373	79	174	3391	2082	632.5	1490	8106	15
TB PTS 67/14	59	599	91	183	3823	1622	9388	3999.5	9334	54
TB PTS 160/14	31	87	49	56	6864	730	3850.5	4779	7597	16
TB PTS 192/14	78.5	52	174	76.5	4360	356	2914	7552	7772	19
TB PTS 196/14	28	68	55	583	1545.5	185	3537	3333	7325	17
TB PTS 222/14	52	164	365	230	3911	100	3713	4952.5	8733	13
TB PTS 266/14	71.5	184	299	164	6008.5	1048	3696.5	5294	8451.5	89
TB DS 27/15	69.5	92.5	125	88	1538	752	4482	2351	4994.5	59
TB DS 3/15	67.5	1452	886	5291	5313.5	3975	6854	10760.5	7339	326
TB DS 4/15	42.5	512.5	152.5	382	9494	1816	3869.5	6535	7918	51
TB DS 5/15	66	192	111	208	1260	407	1923	5960	6524	31
TB DS 7/15	27	171	70	336	4997	385.5	2018	4213	7830	12
TB DS 10/15	222.5	1766	1586	633	10390	4405	9729	9525	6694	140
TB DS 12/15	31	426	179.5	434.5	3475	1026	5187	8467	7662	33.5
TB DS 13/15	43	135	613	207	5250	1666	5056	8195	7667	22.5
TB DS 14/15	59	430	196	587.5	4529	1871	6359	2412	7042	43
TB DS 15/15	50	182.5	166.5	691	10790	1380	10007	9083	7096	36.5
TB DS 16/15	44	130.5	121	296	5798	857	4810	10775	8584	80
TB DS 23/15	50	78	62	80	3844	2426.5	10140	4955	8570	44.5
TB DS 18/15	29	74.5	31	55	1202.5	768.5	4303.5	2523.5	7801	18
TB DS 70/15	77	66	495.5	70	5178.5	888.5	1493	2045	5118	86
TB DS 20/15	30	396	52	96	4052	917	5363	5391	7692	13
TB DS 24/15	32	171	93.5	331	2743	914.5	2209.5	7313	8570	47
TB DS 22/15	72	1431	183	2273	8765	2710	1070.5	6570	7767	61
TB DS 30/15	45	90	3717	70.5	1466	5625.5	5625.5	122.5	8427	27
TB DS 34/15	31	955	60	101	7432.5	2922	8010	5738	8483	14
TB DS 65/15	33.5	146.5	265	1872.5	1925.5	283.5	796	6168.5	8676.5	17
TB DS 73/15	111	613.5	613.5	1302	9845.5	4807.5	5531	10777	8783	130
TB DS 88/15	62	328	242.5	366	2185	574	4062	5040	8666.5	22
TB DS 94/15	43	333	113	562	830	1001	4336	9239	7483	257
TB DS 116/15	26	125.5	36	144.5	645.5	146	2679.5	1764	7939	12
RSV patients, N=5
NR-4021	55	121	104	382	2117.5	1016	3238	3685	8909	30
NR-4022	66	141	103	241	1789	619	1499.5	1751	7175	24
NR-4023	47	241	111.5	160.5	1421	645	4150	1969	7996	35.5
NR-4023	51.5	141	147	192.5	1991	904	3544.5	2998	8769	25
Infleunza patients, N=2
Sera 001	32	281.5	56.5	94	2034	715	1131	5309.5	8194	16
Sera 002	40.5	57	46	95.5	1018	544	2288	2969	8220.5	18
