# Supplementary material for: Immune response dynamics in COVID-19 patients to SARS-CoV-2 and other human coronaviruses
Source: PLoS One. 2021 Jul 9;16(7):e0254367. doi: 10.1371/journal.pone.0254367 (PMC8270414; doi:10.1371/journal.pone.0254367)
Supplement: S5 Appendix — (XLSX) [file pone.0254367.s013.xlsx]

## Sheet: S5 Appendix
COVID-19 and healthy monkeys- Multiplex Antibody Detection (IgG); Median Fluorescence Intensities for each sample
Sample #	SARS-CoV-2 S-RBD	SARS-CoV S	SARS-CoV N	MERS-CoV S-RBD	HCoV 229E S	HCoV NL63 S	HCoV HKU1 S	HCoV OC43 S	Anti-human IgG	BSA
COVID-19 Monkeys, N=9
Experimentally infected with SARS-CoV-2 from CDC, N=1
NR-52401	4311.75	1074.25	2981	859.75	103.5	514.75	340	838.75	5947	1205.25
Experimentally infected with SARS-CoV-2 from UCDavis, N=1
44424-day12 NX	7939.75	238.5	3981.75	71	94.5	46.5	90	225.5	7283.75	107.5
Immunized with adenovirus vaccine for SARS-CoV-2 S protein from UCDavis, N=7
47325-B7-W66 (c)	9439.25	216.25	23.75	19.5	19	15.5	21	24.5	3372.5	9.5
47474-B8-W66 (c)	4982.5	314.75	23	41.75	17.5	15	16.5	84.75	3152.25	9
47479-B9-W69 (d)	6071	249.5	24.75	57.5	19.5	23.5	25	57	3078.25	9.5
47556-B10-W69 (d)	11510.5	1350.5	25.5	27	21.5	19.5	19	31	3352.75	10
45766-A10-W84 (a)	8374	500.5	26.5	71.5	19	16.5	18	41	3445.75	11
45862-A14-W84 (a)	3849.75	257	28.5	92	18.5	16.5	21.25	86.25	3235	10.25
45965-A18-W84 (a)	10098.5	712	25	194.75	19	16	18	210	3241.25	13.75
UCDavis healthy monkeys, N=64
2L69152	28	36.5	192.25	103	26	28.25	28.75	37	5284.25	11
2L69154	24.5	31	30.5	28.75	25.5	22.5	25	29	5077	10
2L69155	29	30.5	30.5	29	25.5	23.5	24	30.5	4608.75	9.5
2L69132	25	34	31.5	442.5	24	21	22.5	36.5	2901	11
2L69140	35	57	44	46	24	22	24	39	3730	52
2L69143	25	32	48	36	26	18	23	29	4687	11
2L69145	32	38	46	41	25	22	24	32	4103	15
2L69147	27	36	36	34	27	27	27.5	31	4008	11
2L69149	37	48	73	46	28	25.5	25.5	46	3879.5	20
2L69150	36	49	39	47	28	27	27	47	4517	18
2L69151	38	57	50	50	31	30	35	52	4042	32
2L69152	26	33	142	97	26	25	22	32	4790	10
2L69153	25	36	70.5	32	26	23	26	32	4571.5	10
2L69155	25	33	29	28	27	21	26.5	28	4063	9
2L69156	30	52	45	38.5	26	23	26	38	3589	22
2L69159	36	45	38	44	26.5	24	26	45.5	3957.5	18
2L69160	30	44	38	42	27	41	31.5	45.5	4479.5	11
2L69162	26	31	45	35	26	22	24	26	4088	9
2L69163	28	39	70	29	26	28	28	29	4077	10
2L69165	25	29	24	30	26	20.5	22	27	4043	9
2L69172	22	33	26	30	24	20	23.5	25.5	3387	10
2L69173	25	39	31	31	28	25	22.5	33	4175	11
35964	26.5	32.5	36	245.5	29	24.5	27	282.5	4072.75	10
36164/09	27.5	32.5	709.75	35.5	25	24.25	33.25	52	5157	22.25
36982/09	129.75	187.5	184.25	199.75	25.5	55.5	44.75	250.5	4913.5	218.25
36744/09	25.75	136	46.5	766.5	25.5	28	24.5	796.5	4031.5	10.5
36862/09	213.5	321	265.75	437.75	26	103.5	61.75	440.5	5330.75	415
36240	52	72.25	88	626.5	27.5	30.5	32.5	669.75	4985	53.5
35643	27.5	34.5	35.5	41	25.5	25.5	26	31.25	5088	10
36926	70.75	124.5	53.75	3979.25	24.5	26.5	27	3913	5392.5	38.25
36323	26.5	35	34.5	68	26.5	22.5	27.5	63.5	4708	13
35624	57	35	51.5	103	26	24	24	89	4333.5	11
36169	26	32	422	35	27	23.5	31	43	4493.5	18
36173	29	46	47	1195	29	23	25	1106	4441.5	11
36215	30	40	36.5	55	27	23	27	35	4313	14
36254	36	36	44	753	25	22	26	827.5	3837	12
36264	57	57	78	1264	28	22.5	27	1277.5	4127	14
36270	28.5	71	32.5	5368.5	26	22	21.5	4750	3614.5	11
36272	30	59	52.5	417	31	23	31	392	4041	12
36288	24	33	32	94	26	21	33	106	4634	10
36302	29	43	48.5	91.5	25	23.5	25	65	4590	15
36317	37	35	37.5	319	26	24	24	287	4544.5	12
36321	33	40.5	42	902	26	25	25	935	3472.5	12
36338	30.5	87	53	3405	27	29	27	3172	4707	15
36344	35	103.5	99	983.5	26.5	31	25	1088	4492.5	25
36346	27	76.5	100	2645	27	23	26	2562	4321	15
36380	27	48	36	2421.5	25	23	23	2487.5	3622	12
36429	28.5	39	55	398	48.5	25	26	404	3949	11
36447	28	32	59	107	27	23	25	92	3536	11
36483	31	56	49.5	1299	26	28	27	1447	4430	23
36520	26	39.5	30	4151	25	20	24	3977	3987.5	11
36538	112	196	150	806	28	56	38	696	4077	206.5
36609	29	37	110.5	246	30	22	29	176	4470.5	15
36620	118	39	28	955	26	22.5	21	937	3662	10
36629	37.5	37	38	39	26	27	24.5	41	4510	11
36637	27	225.5	36	1020	26	25	23	1133	4613.5	17
36671	25	34	29	1286	25	19	24.5	1160	3620	10
36643	26	44	45	1980.5	27	22	25	1910	3405	14
36711	34	37	52	43	32	26	27	41.5	4155	10
36784	26	36	96	2550	28.5	21	24.5	3184	4309	11
36838	24	400.5	42	628.5	26	23	25	765	4204	10
36859	34	44	37	72	26	23.5	24	84	4451.5	13
36961	28	33	49	36	29	24	26	29.5	4146.5	13
36965	29	46	39	141	29	24.5	29.5	125	3832	13
Charles River healthy monkeys, N=39
CR Neg 1.2.1;2014	307.5	651	482.75	1535.5	51.5	170.25	121	1475.5	5095	687.75
CR Neg 1.2.2;2014	165.75	244.75	262	304	49	104.75	87.25	323	5252.5	244.5
CR Neg 1.2.3;2014	38.5	56.5	51.75	103.5	28	30.25	32.25	56.5	5416	35
CR Neg 1.2.15	26	33	62	36	27	22	23.5	34	4654	28
CR Neg 1.2.18	87.5	38	37	46	29	23.5	25	36	3926	15
CR Neg 1.2.20	38	54	50.5	1419	28	27	33	1365.5	4342	20
CR Neg 1.2.21	124	155	263	187	41	80	72.5	211	4296	126
CR Neg 1.2.22	141	222.5	877	3027	382.5	76.5	85.5	2899	3887	236
CR Neg 1.2.23	127	176	259	194	44.5	90	78.5	200	3688	156
CR Neg 1.2.24	54	79	97	170	33	45.5	57	148.5	3920	39
CR Neg 1.2.25	39	52	56.5	555	27	27.5	30	680	3410.5	28
CR Neg 1.2.26	38	62	59	54	26	32	29	58.5	3878.5	37
CR Neg 1.2.28	57.5	72	92	866	33	45	46	864	3911	24
CR Neg 1.2.29	41	54	54.5	64	26	30	29	62	4021	42
CR Neg 1.2.31	101	147	122	298	31	52	43	228	4099	111
CR Neg 1.2.32	38.5	49	60	88	27	29.5	31	90	3318.5	31.5
CR Neg 1.2.33	92	133	390	140	37	63	66	150	4246	132
CR Neg 1.2.34	46.5	63	91	83	29	34	33	75.5	4428	83
CR Neg 1.2.35	73	96.5	121	105	34	49.5	50	119	3784.5	59.5
CR Neg 1.2.36	64	70	97.5	93.5	27	33	33	96	3516	49
CR Neg 1.2.37	56	106	101	111.5	27	34	35.5	123	4159.5	97
CR Neg 1.2.38	82.5	115	43	56	26	23	24	58	3869.5	28.5
CR Neg 1.2.39	91	43	43	45	28	24	25	51	4159	18
CR Neg 1.2.40	30.5	33	35	63	26	22.5	24	158	4121	16
CR Neg 1.2.42	60.5	95	132	101	29	41	46.5	136	3325.5	113
CR Neg 1.2.43	53	262	102	94	43.5	40	41	97	3070	54
CR Neg 1.2.44	55	64	88	66.5	27.5	36.5	37	74	3618	73.5
CR Neg 1.2.47	48	72	82	120	29	37	38	136	3841.5	58
CR Neg 1.2.48	56	74	103	74.5	31	40	45	85.5	4549	46
CR Neg 1.2.49	44	59	81	65	29	31	32	63.5	3535	74
CR Neg 1.2.52	81	106.5	131.5	102.5	27	41	33	80	4261.5	114.5
CR Neg 1.2.53	49	64	73.5	53	27	28	30.5	57.5	3718	77
CR Neg 1.2.54	77	61	70	65	28	31	175.5	88	4280.5	56
CR Neg 1.2.56	52.5	369	78	722	29	36	35	654	4101	60
CR Neg 1.2.57	66	81	97	96.5	33	44.5	44	95	3962	44
CR Neg 1.2.58	47	145	49	153.5	28	29	30	128	4153.5	35
CR Neg 1.2.59	31	41	57	45	25	24	25	82.5	4116	33
CR Neg 1.2.60	32	37	45	53	24	23	26	161	3249	19
CR Neg 1.2.61	43.5	1325.5	81	382	28	34	38	214.5	3796.5	32
